# Supplementary material
Source: publisher figshare collection journal article supplement (https://frontiersin.figshare.com/ndownloader/files/22723820)
Supplement: Supplementary file [file 22723820]

## Supplementary Material

# Stromatolites as biosignatures of atmospheric oxygenation: Carbonate biomineralization and UV-C resilience in a *Geitlerinema* sp. - dominated culture

Rabja Maria Popall, Henk Bolhuis, Gerard Muyzer, Mónica Sánchez-Román \*

\* **Correspondence:** Mónica Sánchez-Román - email: [m.sanchezroman@vu.nl](mailto:m.sanchezroman@vu.nl)

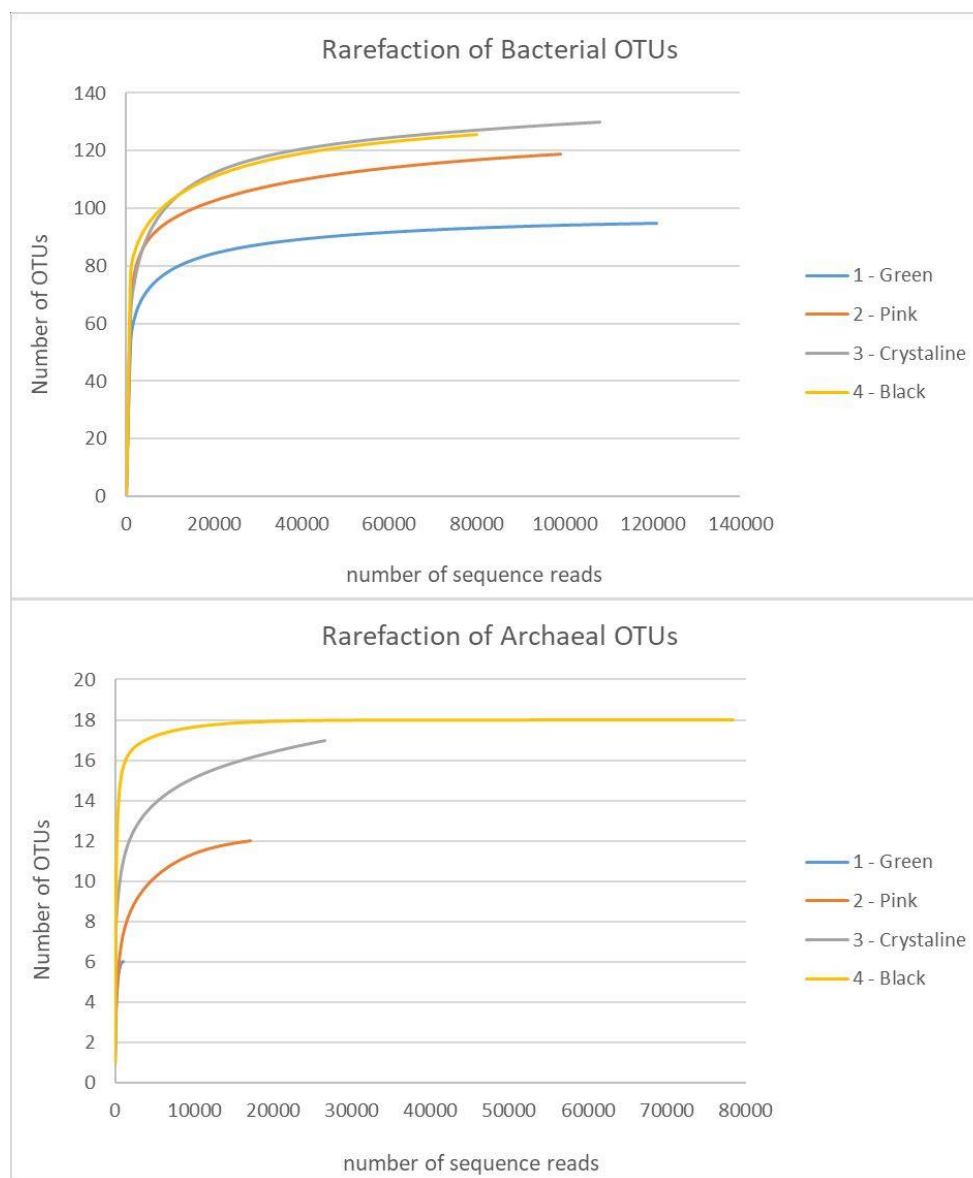

**Supplementary Figure S1:** Rarefaction curves of bacterial and archaeal OTUs

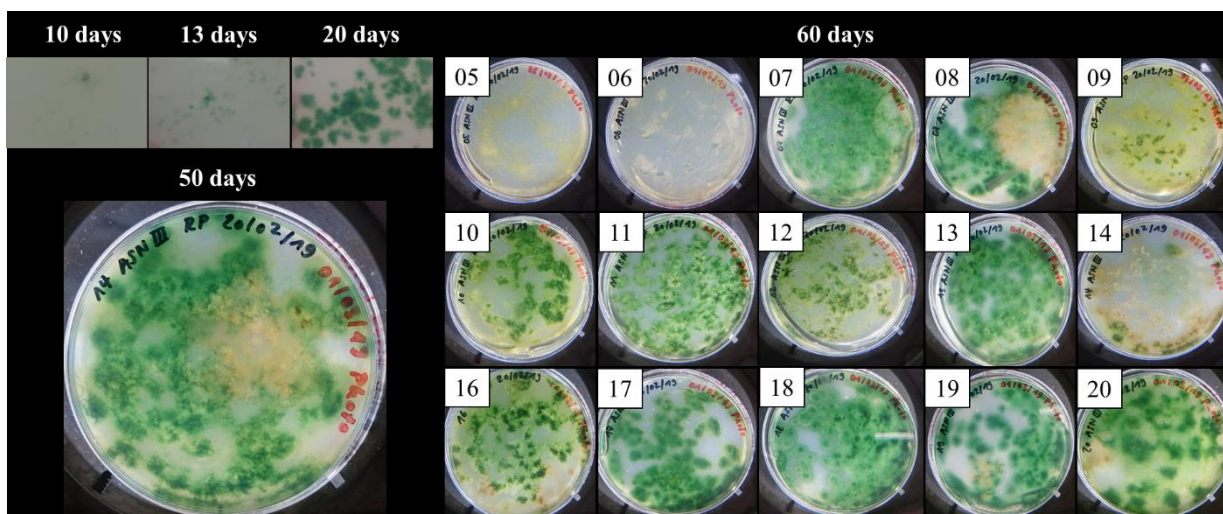

**Supplementary Figure S2:** Culture growth on solid ASN-III medium over time. After 60 days, the filamentous surface cover started to recess. Plate 06 had been overgrown by light-green bacterial mats prior to being sampled for taxonomic identification. Additionally, plate 05 and 09 feature light-green overgrowth as opposed to the remaining 13 dishes. Plate 15 was overgrown by dark-green filaments and given to NIOZ after sampling for isolate identification, hence it is missing in the scheme. Plate numbers 01-04 were not assigned to this experiment. Plates 07, 08, 14, 16, 19 and 20 feature browning after 60 days.

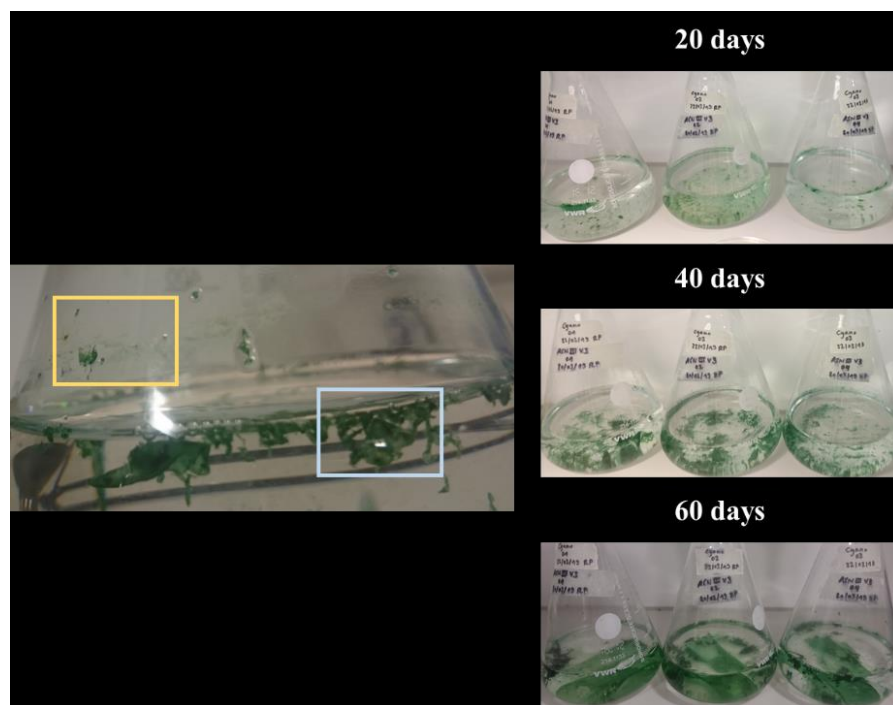

**Supplementary Figure S3:** Culture growth in liquid ASN-III medium over time. Cultures settling on the glass surface are marked in yellow and swimming mats in blue.

**Supplementary Table S1.** ASN-III media compositions in culture (C) and UVR (U) experiments, as well as solid (S) and liquid (L) and A-5 trace metal mix after Rippka et al. (1979). Modifications to the original recipe are highlighted in light blue. The pH of culture experiment medium was adjusted to ~7.5 with 1M acetic acid prior to autoclaving if applicable. The bicarbonate for UVR experiments was filter-sterilized.  $\text{CaCl}_2$  was autoclaved separately to avoid abiotic precipitation at high temperatures.

**Culture experiments:**

| ASN-III-CS medium |                                           |
|-------------------|-------------------------------------------|
| Amount /liter     | Ingredient                                |
| 1,000ml           | Deionized water                           |
| 35g               | NaCl                                      |
| 3.5g              | $\text{MgSO}_4 \cdot 7\text{H}_2\text{O}$ |
| 8.0g              | $\text{MgCl}_2 \cdot 6\text{H}_2\text{O}$ |
| 1g                | $\text{CaCl}_2 \cdot 2\text{H}_2\text{O}$ |
| 0.5g              | KCl                                       |
| 0.75g             | $\text{NaNO}_3$                           |
| 0.015g            | $\text{K}_2\text{HPO}_4$                  |
| 1.0g              | $\text{Na}_2\text{CO}_3$                  |
| 0.0005g           | EDTA                                      |
| 0.0033g           | Citric acid monohydrate                   |
| 0.003g            | Ferric ammonium citrate                   |
| 1ml               | Trace metal mix A-5                       |
| 20g               | Agar                                      |

| ASN-III-CL medium |                                           |
|-------------------|-------------------------------------------|
| Amount /liter     | Ingredient                                |
| 1,000ml           | Deionized water                           |
| 70g               | NaCl                                      |
| 3.5g              | $\text{MgSO}_4 \cdot 7\text{H}_2\text{O}$ |
| 8.0g              | $\text{MgCl}_2 \cdot 6\text{H}_2\text{O}$ |
| 1g                | $\text{CaCl}_2 \cdot 2\text{H}_2\text{O}$ |
| 0.5g              | KCl                                       |
| 0.75g             | $\text{NaNO}_3$                           |
| 0.015g            | $\text{K}_2\text{HPO}_4$                  |
| 0.25g             | $\text{NaHCO}_3$                          |
| 0.0005g           | EDTA                                      |
| 0.0033g           | Citric acid monohydrate                   |
| 0.003g            | Ferric ammonium citrate                   |
| 1ml               | Trace metal mix A-5                       |
| -                 | -                                         |

**UVR experiments:**

| ASN-III-US medium |                                           |
|-------------------|-------------------------------------------|
| Amount /liter     | Ingredient                                |
| 1,000ml           | Deionized water                           |
| 35g               | NaCl                                      |
| 3.5g              | $\text{MgSO}_4 \cdot 7\text{H}_2\text{O}$ |
| 8.0g              | $\text{MgCl}_2 \cdot 6\text{H}_2\text{O}$ |
| 1g                | $\text{CaCl}_2 \cdot 2\text{H}_2\text{O}$ |
| 0.5g              | KCl                                       |
| 0.75g             | $\text{NaNO}_3$                           |
| 0.015g            | $\text{K}_2\text{HPO}_4$                  |
| 0.07g             | $\text{NaHCO}_3$                          |
| 0.0005g           | EDTA                                      |
| 0.0033g           | Citric acid monohydrate                   |
| 0.003g            | Ferric ammonium citrate                   |
| 1ml               | Trace metal mix A-5                       |
| 20g               | Agar                                      |

| ASN-III-UL medium |                                           |
|-------------------|-------------------------------------------|
| Amount /liter     | Ingredient                                |
| 1,000ml           | Deionized water                           |
| 35g               | NaCl                                      |
| 3.5g              | $\text{MgSO}_4 \cdot 7\text{H}_2\text{O}$ |
| 8.0g              | $\text{MgCl}_2 \cdot 6\text{H}_2\text{O}$ |
| 1g                | $\text{CaCl}_2 \cdot 2\text{H}_2\text{O}$ |
| 0.5g              | KCl                                       |
| 0.75g             | $\text{NaNO}_3$                           |
| 0.015g            | $\text{K}_2\text{HPO}_4$                  |
| 0.07g             | $\text{NaHCO}_3$                          |
| 0.0005g           | EDTA                                      |
| 0.0033g           | Citric acid monohydrate                   |
| 0.003g            | Ferric ammonium citrate                   |
| 1ml               | Trace metal mix A-5                       |
| -                 | -                                         |

| Trace metal mix A-5 |                                                       |
|---------------------|-------------------------------------------------------|
| Amount /liter       | Ingredient                                            |
| 1,000ml             | Deionized water                                       |
| 2.86g               | H <sub>3</sub> BO <sub>3</sub>                        |
| 1.32g               | MnCl <sub>2</sub> * 1H <sub>2</sub> O                 |
| 0.222g              | ZnSO <sub>4</sub> * 7H <sub>2</sub> O                 |
| 0.039g              | Na <sub>2</sub> MoO <sub>4</sub> * 2H <sub>2</sub> O  |
| 0.079g              | CuSO <sub>4</sub> * 5H <sub>2</sub> O                 |
| 0.0494g             | Co(NO <sub>3</sub> ) <sub>2</sub> * 6H <sub>2</sub> O |

Rippka, R., Deruelles, J., Waterbury, J. B., Herdman, M., and Stanier, R. Y. (1979). Generic Assignments, Strain Histories and Properties of Pure Cultures of Cyanobacteria. *Journal of General Microbiology* III, 1–61.

**Supplementary Table S2.** Diversity and Richness indices of the 4 mat layers.

| Layer           | Bacteria |           |          |        | Archaea |           |          |        |
|-----------------|----------|-----------|----------|--------|---------|-----------|----------|--------|
|                 | reads    | Shannon_H | Evenness | Chao-1 | reads   | Shannon_H | Evenness | Chao-1 |
| 1 - Green       | 122208   | 2,89      | 0,19     | 96     | 1131    | 0.37      | 0.24     | 6      |
| 2 - Pink        | 100217   | 2,95      | 0,16     | 125    | 17383   | 0.19      | 0.10     | 12     |
| 3 - Crystalline | 109666   | 2,82      | 0,13     | 135    | 26783   | 1.03      | 0.16     | 17.5   |
| 4 - Black       | 81969    | 3,22      | 0,20     | 135    | 78595   | 1.07      | 0.16     | 18     |

**Supplementary Table S3.** Percent identity of archaeal and bacterial OTUs to best blast hits against the NCBI nt database (% nt) and the 16S ribosomal RNA (Bacteria and Archaea) type strain database (% type strains)

| Archaeal OTUs |      |                | Bacterial OTUs |      |                |
|---------------|------|----------------|----------------|------|----------------|
| OUT_ID        | % nt | % type strains | OUT_ID         | % nt | % type strains |
| OTU_29        | 99.5 | 78.8           | OTU_18         | 99.4 | 99.4           |
| OTU_30        | 99.5 | 78.7           | OTU_19         | 96.6 | 95.7           |
| OTU_25        | 97.8 | 79.2           | OTU_80         | 99.6 | 89.9           |
| OTU_26        | 98.8 | 82.3           | OTU_81         | 98.7 | 97.8           |
| OTU_28        | 93.7 | 79.9           | OTU_20         | 98.1 | 96.6           |
| OTU_13        | 96.7 | 95.2           | OTU_23         | 99.4 | 98.9           |
| OTU_14        | 99.5 | 98.6           | OTU_43         | 95.3 | 94.7           |
| OTU_15        | 99.0 | 95.5           | OTU_22         | 99.1 | 89.1           |
| OTU_16        | 99.0 | 97.6           | OTU_47         | 96.4 | 96.4           |
| OTU_17        | 99.5 | 99.3           | OTU_111        | 99.8 | 92.4           |
| OTU_18        | 99.5 | 80.9           | OTU_21         | 99.4 | 98.5           |
| OTU_19        | 99.0 | 82.1           | OTU_155        | 93.9 | 84.2           |
| OTU_20        | 96.9 | 82.8           | OTU_24         | 99.4 | 98.7           |
| OTU_21        | 99.3 | 82.8           | OTU_26         | 98.5 | 96.6           |
| OTU_22        | 97.3 | 82.7           | OTU_92         | 95.0 | 94.0           |
| OTU_23        | 99.5 | 82.1           | OTU_136        | 99.6 | 98.0           |
| OTU_24        | 96.4 | 82.3           | OTU_77         | 98.7 | 83.4           |
| OTU_27        | 98.8 | 91.8           | OTU_25         | 99.6 | 89.6           |

For bacteria, only the most abundant OTUs are depicted in this table.

**Supplementary Table S4.** Percent relative abundance the 20 most abundant bacterial genera per layer. Taxa without cultured representatives and thus no given names are identified with \_f and \_g prefixes.

| 1 – Green                |       | 2 – Pink                   |       | 3 – Crystalline            |       | 4 - Black                  |       |
|--------------------------|-------|----------------------------|-------|----------------------------|-------|----------------------------|-------|
| Genus                    | %     | Genus                      | %     | Genus                      | %     | Genus                      | %     |
| Balneolaceae_g           | 34.02 | <i>Marinobacter</i>        | 35.00 | <i>Marinobacter</i>        | 37.48 | <i>Marinospirillum</i>     | 29.75 |
| Spirochaeta 2            | 21.34 | <i>Marinospirillum</i>     | 20.93 | <i>Marinospirillum</i>     | 24.65 | <i>Marinobacter</i>        | 17.93 |
| <i>Marinobacter</i>      | 15.65 | Balneolaceae_g             | 11.30 | Spirochaeta 2              | 5.23  | <i>Halanaerobium</i>       | 14.43 |
| <i>Marinospirillum</i>   | 12.09 | Spirochaeta 2              | 6.54  | <i>Halanaerobium</i>       | 3.65  | Spirochaeta 2              | 7.49  |
| <i>Geitlerinema</i>      | 6.47  | Phycisphaeraceae_g         | 5.85  | <i>Marinimicrobium</i>     | 3.50  | Oligoflexales_f_g          | 4.26  |
| <i>Halanaerobium</i>     | 1.54  | <i>Halanaerobium</i>       | 5.07  | Fodinicurvataceae_g        | 2.95  | Marinilabiliaceae_g        | 3.24  |
| <i>Marinimicrobium</i>   | 1.15  | <i>Geitlerinema</i>        | 1.86  | Phycisphaeraceae_g         | 2.91  | <i>Sediminispirochaeta</i> | 3.14  |
| <i>Salinarimonas</i>     | 0.98  | <i>Alkalispirochaeta</i>   | 1.48  | Balneolaceae_g             | 2.76  | Clostridiales_f_g          | 2.32  |
| Gammaproteobacteria_f_g2 | 0.81  | <i>Sediminispirochaeta</i> | 1.11  | <i>Alkalispirochaeta</i>   | 2.40  | <i>Desulfosalsimonas</i>   | 2.12  |
| <i>Halomicronema</i>     | 0.80  | Gammaprot._KI89A clade_f_g | 1.08  | <i>Pelagibius</i>          | 2.15  | Desulfobacteraceae_g       | 1.63  |
| <i>Dichotomicrobium</i>  | 0.63  | <i>Oceanicaulis</i>        | 0.83  | <i>Dichotomicrobium</i>    | 1.73  | Balneolaceae_g             | 1.42  |
| Fodinicurvataceae_g      | 0.56  | Gammaproteobacterium_f_g   | 0.83  | <i>Sediminispirochaeta</i> | 1.49  | Atribacteria_f_g           | 1.11  |
| Nodosilineaceae_g        | 0.43  | <i>Dichotomicrobium</i>    | 0.66  | <i>Lewinella</i>           | 1.21  | Bacteroidetes_f_g          | 1.10  |
| <i>Anaerophaga</i>       | 0.42  | Nitrosococcaceae_g         | 0.59  | Planctomycete_f_g          | 1.18  | Anaerolineae_SBR1031_f_g   | 0.98  |
| Gammaproteobacterium_f_g | 0.41  | Rhizobiaceae_g             | 0.53  | Gammaprot._KI89A clade_f_g | 1.15  | Phycisphaerales_f_g        | 0.86  |
| Thalassobaculales_f_g    | 0.28  | Fodinicurvataceae_g        | 0.51  | Rhizobiaceae_g             | 0.46  | <i>Alkalispirochaeta</i>   | 0.74  |
| <i>Ruegeria</i>          | 0.27  | <i>Anaerophaga</i>         | 0.48  | Parvibaculaceae_g          | 0.43  | Candidatus Marispirochaeta | 0.68  |
| <i>Dactylococcopsis</i>  | 0.25  | Halobacteroidaceae_g       | 0.48  | <i>Orenia</i>              | 0.39  | <i>Desulfovibrio</i>       | 0.64  |
| Saprospiraceae_g         | 0.23  | <i>Wenzhouxiangella</i>    | 0.40  | <i>Salinarimonas</i>       | 0.39  | <i>Anaerophaga</i>         | 0.57  |
| Nitrosococcaceae_g       | 0.22  | <i>Ruegeria</i>            | 0.39  | <i>Oceanicaulis</i>        | 0.35  | Syntrophomonadaceae_g      | 0.52  |

**Supplementary Table S5.** Bacterial genera dominant in only one of the 4 microbial mat layers (indicated by grey shading).

|                              | 1 - Green | 2 - Pink | 3 - Crystalline | 4 - Black |
|------------------------------|-----------|----------|-----------------|-----------|
| Oligoflexales_f_g            | 0         | 0.004    | 0.011           | 4.262     |
| Clostridiales_f_g            | 0         | 0.001    | 0.001           | 2.317     |
| Desulfobacteraceae_g         | 0         | 0        | 0.005           | 1.626     |
| Phycisphaerales_f_g          | 0         | 0.003    | 0.006           | 0.856     |
| Candidatus Marispirochaeta_g | 0         | 0.004    | 0.005           | 0.682     |
| Aerophobetes_f_g             | 0         | 0        | 0               | 0.434     |
| <i>Halocella</i>             | 0         | 0        | 0               | 0.299     |
| Bacteroidetes vadinHA17_g    | 0         | 0        | 0               | 0.278     |
| Aminicenantales_f_g          | 0         | 0        | 0.001           | 0.271     |
| Babeliales_f_g               | 0         | 0        | 0               | 0.261     |
| <i>Pelagibius</i>            | 0.003     | 0.034    | 2.152           | 0.002     |
| <i>Defluviicoccus</i>        | 0.002     | 0.256    | 0.001           | 0         |
| <i>Cryomorpha</i>            | 0.013     | 0        | 0               | 0         |
